# Supplementary material for: A Systematic Review of Mendelian Randomization Studies on Celiac Disease
Source: bioRxiv or medRxiv preprint supplement (doi:10.1101/2024.07.03.24309885), 2024-09-08
Supplement: Supplementary file [file media-1.pdf]

**Table 1: A summary of the included studies.**

| Author       | Year | Exposure Variable                                             | Outcome Variable                                | Main Results                                                                                                                                                                                                               |
|--------------|------|---------------------------------------------------------------|-------------------------------------------------|----------------------------------------------------------------------------------------------------------------------------------------------------------------------------------------------------------------------------|
| Li et al.    | 2023 | CeD (GWAS)                                                    | Various autoimmune diseases (GWAS)              | Significant ORs: CD (OR: 1.08, 1.04 - 1.11), GD (OR: 1.25, 1.13 - 1.39), PSC (OR: 1.30, 1.23 - 1.39), PsO (OR: 1.12, 1.06 - 1.18), SLE (OR: 1.30, 1.22 - 1.39), T1D (OR: 1.3, 1.23 - 1.38), Asthma (OR: 1.05, 1.02 - 1.07) |
| Zhang et al. | 2024 | CeD (IEU OpenGWAS)                                            | Risk of facial aging (UK Biobank)               | OR: 1.002, 1.001 - 1.004                                                                                                                                                                                                   |
| Sun et al.   | 2024 | CeD (FinnGen biobank)                                         | Sarcoidosis (FinnGen biobank)                   | OR: 1.22, 1.15 - 1.28                                                                                                                                                                                                      |
| Zou et al.   | 2024 | Critical COVID-19 (COVID-19 Host Genetics Init)               | CeD (GWAS)                                      | OR: 1.115, 1.007 - 1.234                                                                                                                                                                                                   |
| Wang et al.  | 2024 | 1-oleoylglycerophosphoethanolamine (Metabolomics GWAS server) | CeD (GWAS)                                      | OR: 11.271, 2.053 - 61.882                                                                                                                                                                                                 |
| Su et al.    | 2024 | CeD (GWAS)                                                    | Bronchiectasis (FinnGen R9 Consortium)          | OR: 0.949, 0.902 - 0.999                                                                                                                                                                                                   |
| Zhou et al.  | 2024 | CeD (IEU OpenGWAS)                                            | Sarcoidosis (FinnGen consortium, UK Biobank)    | OR: OR: 1.13, 1.07 - 1.20                                                                                                                                                                                                  |
| Yuan et al.  | 2024 | CeD (GWAS)                                                    | Various clinical outcomes (UK Biobank, FinnGen) | Significant ORs: T1D (OR: 1.09, 1.07 - 1.10), GD (OR: 1.06, 1.04 - 1.08), SLE (OR: 1.10, 1.06 - 1.14), Chronic hepatitis (OR: 1.13, 1.08 - 1.18)                                                                           |
| Chen et al.  | 2024 | CeD (GWAS)                                                    | Colorectal Cancer (Two GWAS datasets)           | OR: 1.016, 0.983 - 1.051                                                                                                                                                                                                   |

|                 |      |                                                                                  |                                                            |                                                                                                                                     |
|-----------------|------|----------------------------------------------------------------------------------|------------------------------------------------------------|-------------------------------------------------------------------------------------------------------------------------------------|
| Li et al.       | 2023 | CeD (MRC Integrative Epidemiology Unit, FinnGen)                                 | Sepsis (MRC-IEU, FinnGen)                                  | OR: 1.018, 0.997 - 1.039                                                                                                            |
| Wei et al.      | 2023 | CeD (GWAS catalog)                                                               | Gastric Cancer (FinnGen database)                          | OR: 0.9509, 0.8416 - 1.0744                                                                                                         |
| Xu et al.       | 2023 | CeD (IEU GWAS)                                                                   | NAFLD (UK Biobank, Estonian Biobank)                       | OR: 0.973, 0.949 - 0.997                                                                                                            |
| González-García | 2023 | Gut Microbiota (GWAS of Gut Microbiota by MiBioGen consortium)                   | CeD (ImmunoChip CeD study)                                 | Significant ORs: Ruminococcaceae UCG010 (OR: 5.42, exact CI not provided), Lachnospiraceae UCG008 (OR: 4.31, exact CI not provided) |
| Yin et al.      | 2023 | CeD (GWAS)                                                                       | Liver Cancer (FinnGen)                                     | OR: 0.91, 0.74 - 1.11                                                                                                               |
| Li et al.       | 2023 | Gut microbiota, Metabolites (MiBioGen consortium, GWAS data of human metabolome) | CeD (GWAS)                                                 | Significant ORs: Bifidobacterium (OR: 1.447, 1.054 - 1.988), Bifidobacteriales (OR: 1.483, 1.053 - 2.088)                           |
| Gu et al.       | 2022 | Inflammatory Bowel Disease (GWAS)                                                | CeD (GWAS)                                                 | ORs: IBD to CeD (OR: 1.08, 1.03 - 1.14), CeD to CD (OR: 1.04, 1.00 - 1.07)                                                          |
| Shi et al.      | 2022 | Inflammatory Bowel Disease (IEU GWAS)                                            | CeD (IEU GWAS)                                             | Significant ORs: IBD to CeD (OR: 1.24, 1.16 - 1.34), CD to CeD (OR: 1.27, 1.19 - 1.35)                                              |
| Tang et al.     | 2023 | Multisite Chronic Pain (UK Biobank)                                              | CeD (GWAS)                                                 | OR: 0.24, 0.02 - 3.64                                                                                                               |
| Masot et al.    | 2023 | CeD (GWAS)                                                                       | Mature T/NK cell lymphomas (FinnGen)                       | OR: 1.72, 1.18 - 2.53                                                                                                               |
| Yuan et al.     | 2023 | CeD (GWAS)                                                                       | Inflammatory Bowel Disease (GWAS)                          | OR for CD: 1.1408, 1.0614 - 1.2261                                                                                                  |
| Li et al.       | 2022 | CeD (UK Biobank, GWAS)                                                           | COVID-19 severity (COVID-19 Host Genetics Initiative GWAS) | OR: 0.919, 0.844 - 0.999                                                                                                            |

|                 |      |                                                                         |                                           |                                                                         |
|-----------------|------|-------------------------------------------------------------------------|-------------------------------------------|-------------------------------------------------------------------------|
| Xu et al.       | 2022 | Gut Microbiota (GWAS)                                                   | CeD (GWAS)                                | OR: 1.401, 1.139 - 1.722                                                |
| Welander et al. | 2023 | CeD (GWAS)                                                              | Migraine (GWAS)                           | Significant ORs: MO (OR: 0.95, 0.92 - 0.99), MA (OR: 1.04, 1.00 - 1.08) |
| Alipour et al.  | 2022 | CeD (IEU OpenGWAS)                                                      | Amyotrophic Lateral Sclerosis (MinE GWAS) | OR: 1.016, 0.992 - 1.040                                                |
| Maihofer et al. | 2024 | Genetically predicted PTSD (PGC-PTSD Freeze 3 GWAS)                     | CeD (NHGRI-EBI GWAS)                      | OR: 0.87, 0.78 - 0.97                                                   |
| Ruan et al.     | 2023 | Depression (GWAS, UK Biobank, 23andMe, Psychiatric Genomics Consortium) | CeD (UK Biobank, FinnGen)                 | OR: 0.64, 0.36 - 1.15                                                   |
| Li et al.       | 2022 | CeD (GWAS)                                                              | Psoriasis (GWAS)                          | OR: 1.232, 1.061 - 1.432                                                |
| Huang et al.    | 2022 | CeD (GWAS)                                                              | Cardiovascular Diseases (IEU GWAS)        | Non-significant associations                                            |
| Wang et al.     | 2023 | Systemic Lupus Erythematosus (MRC-IEU)                                  | CeD ( MRC-IEU)                            | OR: 1.24, 1.03 - 1.49                                                   |
| Hua et al.      | 2022 | Rheumatoid Arthritis (GWAS)                                             | CeD (GWAS)                                | OR: 1.46, 1.19 - 1.79                                                   |
| Chen et al.     | 2023 | CeD (GWAS)                                                              | Nasal Polyps (UK Biobank)                 | OR: 1.000494, 1.000067 - 1.000922                                       |
| Yuan et al.     | 2024 | CeD (GWASs)                                                             | Senile Cataract (FinnGen)                 | OR: 1.04, 1.01 - 1.08                                                   |
| Zhou et al.     | 2024 | Crohn's Disease (GWAS)                                                  | CeD (GWAS)                                | OR: 1.14, 1.03 - 1.25                                                   |
| Wen et al.      | 2024 | Air Pollutants (UK Biobank)                                             | CeD ( FinnGen)                            | ORs: NOX (OR: 0.14, 0.04 - 0.43), PM2.5 (OR: 0.17, 0.05 - 0.55)         |
| Zhou et al.     | 2024 | CeD (FinnGen)                                                           | Frozen Shoulder (UK Biobank)              | OR: 1.02, 1.01 - 1.04                                                   |

**Abbreviations:** CeD: Celiac Disease | CD: Crohn's Disease | GD: Graves' Disease | PSC: Primary Sclerosing Cholangitis | PsO: Psoriasis | SLE: Systemic Lupus Erythematosus | T1D: Type 1 Diabetes | GWAS: Genome-Wide Association Studies | IVW: Inverse Variance Weighted | WM: Weighted Median | MO: Migraine without Aura | MA: Migraine with Aura | IBD: Inflammatory Bowel Disease | UC: Ulcerative Colitis | NAFLD: Non-Alcoholic Fatty Liver Disease | MRC-IEU: MRC Integrative Epidemiology Unit | FinnGen: FinnGen Research Project | OR: Odds Ratio | CI: Confidence Interval.
