# Supplementary material for: A Systematic Review of Mendelian Randomization Studies on Celiac Disease
Source: bioRxiv or medRxiv preprint supplement (doi:10.1101/2024.07.03.24309885), 2024-09-08
Supplement: Supplementary file [file media-2.pdf]

## Supplementary materials

### A Systematic Review of Mendelian Randomization Studies on Celiac Disease

**Specific Booleans used to screen each data base:**

#### **PubMed**

("Mendelian Randomization" OR "Mendelian Randomisation" OR "genetic instrumental variables") AND ("Celiac Disease" OR "Coeliac Disease" OR "gluten-sensitive enteropathy")

#### **OID (MEDLINE)**

("Mendelian Randomization" OR "Mendelian Randomisation" OR "genetic instrumental variables") AND ("Celiac Disease" OR "Coeliac Disease" OR "gluten-sensitive enteropathy")

#### **Scopus**

( TITLE-ABS-KEY ( "Mendelian Randomization" OR "Mendelian Randomisation" OR "genetic instrumental variables" ) AND TITLE-ABS-KEY ( "Celiac Disease" OR "Coeliac Disease" OR "gluten-sensitive enteropathy" ) ) AND ( LIMIT-TO ( DOCTYPE , "ar" ) ) AND ( LIMIT-TO ( EXACTKEYWORD , "Mendelian Randomization Analysis" ) )

#### **Web of science**

(TS=("Mendelian Randomization" OR "Mendelian Randomisation" OR "genetic instrumental variables") AND TS=("Celiac Disease" OR "Coeliac Disease" OR "gluten-sensitive enteropathy"))

#### **Embase**

('mendelian randomization'/exp OR 'mendelian randomization' OR 'mendelian randomisation'/exp OR 'mendelian randomisation' OR 'genetic instrumental variables') AND ('celiac disease'/exp OR 'celiac disease' OR 'coeliac disease'/exp

OR 'coeliac disease' OR 'gluten-sensitive enteropathy'/exp OR 'gluten-sensitive enteropathy')

AND

[embase]/lim NOT ([embase]/lim AND [medline]/lim) AND 'article'/it

### **Cochrane Library**

("Mendelian Randomization" OR "Mendelian Randomisation" OR "genetic instrumental variables") AND ("Celiac Disease" OR "Coeliac Disease" OR "gluten-sensitive enteropathy")

**Table S1: Risk of bias evaluation of the included studies.**

| <b>Author</b>          | <b>IV1</b> | <b>IV2</b> | <b>IV3</b> |
|------------------------|------------|------------|------------|
| Li et al               | high       | moderate   | high       |
| Zhang et al            | high       | high       | high       |
| Sun et al              | high       | moderate   | high       |
| Zou et al              | high       | high       | high       |
| Wang et al             | high       | high       | high       |
| Su et al               | high       | high       | high       |
| Zhou et al             | high       | moderate   | high       |
| Yuan et al             | high       | high       | high       |
| Chen et al             | high       | high       | moderate   |
| Li et al               | moderate   | moderate   | poor       |
| Wei et al.             | Moderate   | Poor       | Poor       |
| Xu et al.              | High       | Moderate   | High       |
| González-García et al. | Moderate   | High       | High       |
| Yin et al.             | High       | High       | High       |
| Li et al. (3)          | Moderate   | High       | High       |
| Gu et al.              | High       | High       | High       |
| Shi et al.             | High       | High       | High       |
| Tang et al.            | High       | Poor       | Poor       |
| Masot et al.           | High       | High       | High       |
| Yuan et al. (2)        | High       | High       | High       |
| Li et al.              | High       | Moderate   | High       |
| Xu et al.              | High       | High       | High       |
| Welander et al.        | High       | High       | High       |
| Alipour et al.         | High       | High       | High       |

|                        |      |      |          |
|------------------------|------|------|----------|
| <b>Maihofer et al.</b> | High | High | High     |
| <b>Ruan et al.</b>     | High | High | High     |
| <b>Li et al. (5)</b>   | High | High | High     |
| <b>Huang et al.</b>    | High | High | High     |
| <b>Wang et al.</b>     | High | High | Moderate |
| <b>Hua et al</b>       | High | High | High     |
| <b>Chen et al.</b>     | High | High | High     |
| <b>Yuan et al.</b>     | High | High | High     |
| <b>Zhou et al. (2)</b> | High | High | High     |
| <b>Wen et al.</b>      | High | High | High     |
| <b>Zhou et al. (3)</b> | High | High | High     |

**Abbreviations:** IV: Instrumental variable | IV1: Relevance | IV2: Independence | IV3: Exclusion-restriction.
